# Supplementary material
Source: PubMed Central journal article supplement (PMC4560287)
Supplement: JB.00259-15_zjb999093763so1.pdf [file JB.00259-15_zjb999093763so1.pdf]

1 **SUPPLEMENTARY MATERIAL**

2 **Supplementary Figure S1**

3

4 **A**

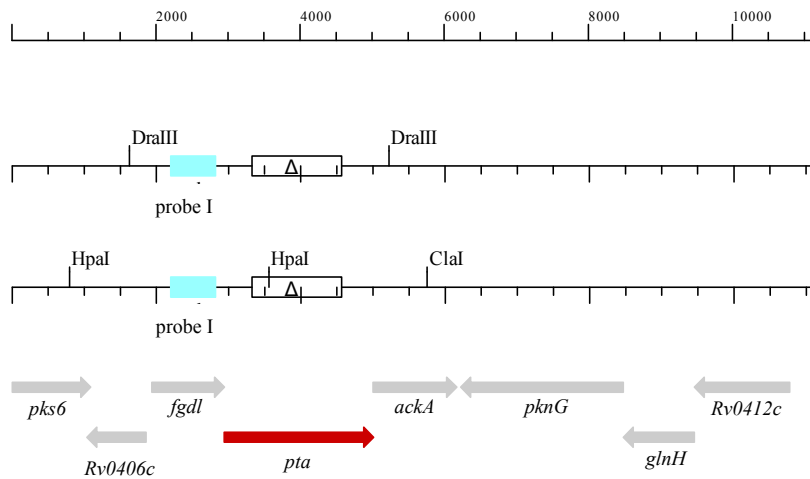

6

7

**B**

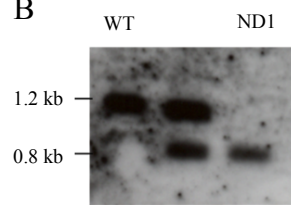

**C**

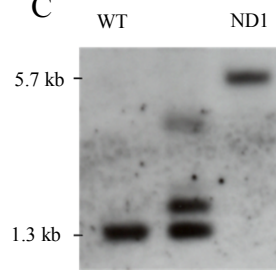

8

9

10

**D**

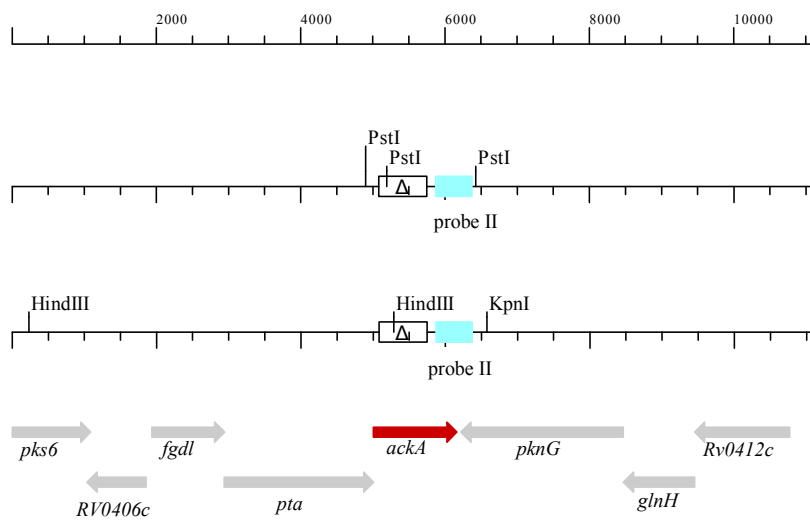

13

14

15  
16  
17  
18  
19  
20  
21  
22  
23  
24  
25  
26  
27  
28  
29  
30  
31  
32

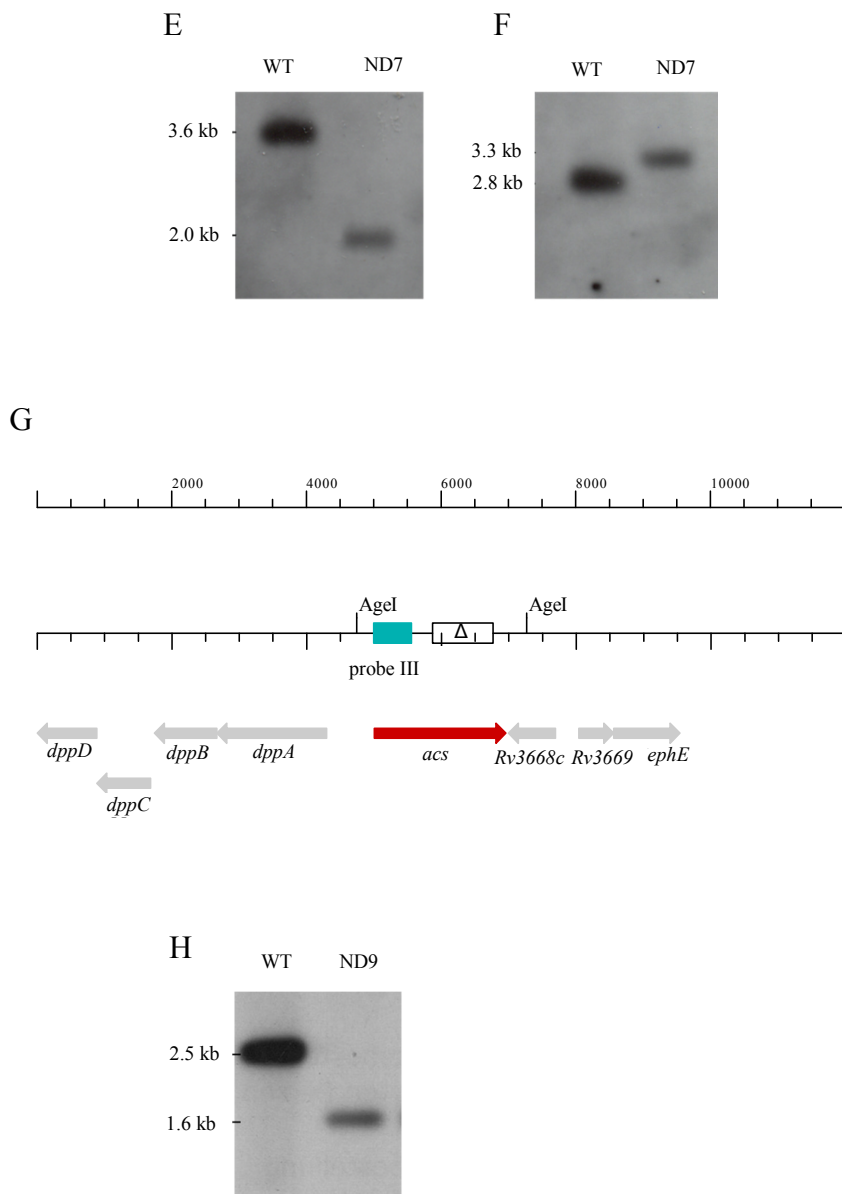

**Figure S1: Knock-out strains were validated via Southern Blot analysis.** Genomic DNA of *Mtb* H37Rv wild type (WT),  $\Delta$ *pta*,  $\Delta$ *ackA* and  $\Delta$ *acs* mutant was isolated and digested as described below and further analyzed with Southern blot analysis. Genes are written in italics and the gene of interest is highlighted in red. The restriction sites important for Southern blot analysis are depicted in the map. The deleted sequences are indicated with a box labelled  $\Delta$ , while the blue boxes represent probe binding sites. A) Explains the two different strategies used to validate the  $\Delta$ *ackA* mutant (ND1): *Pst* I digestion and *Hind* III-*Kpn* I double digestion. B) Southern blot showing the results of the *Pst* I digestion. C) Southern blot showing the results of the *Hind* III and *Kpn* I double digestion. D) Explains the two different strategies

33 used to validate the  $\Delta pta$  mutant (ND7): *Dra* III digestion and *Hind* III-*Kpn* I double  
34 digestion. E) Southern blot showing the result of the *Dra* III digestion. F) Southern blot  
35 showing the results of the *Hpa* I-*Cla* I double digestion. G) Explains the strategy used to  
36 validate the  $\Delta acs$  mutant (ND9): the *Age* I digestion. H) Southern blot showing the result of  
37 the *Age* I digestion. For further details see method section.

## 38 **METHOD**

### 39 **Verification of $\Delta ackA$ , $\Delta pta$ and $\Delta acs$ knock-out mutants in *Mtb* by Southern Blot**

40 **analysis.** To analyze the knock-out mutants for gene deletion by allelic exchange, different  
41 DNA probes were generated by PCR from chromosomal DNA of *Mtb* H37Rv. To amplify a  
42 501 bp probe corresponding to the sequence downstream of the *ackA* gene the following  
43 primers were used: 5'-caccggttgcgcaagtac-3', and 5'-gcaccaaccacatcctcg-3'. The 621 bp  
44 probe corresponding to the sequence upstream of the *pta* gene was amplified by the following  
45 primers: 5'-ggctttcgccaccatggg-3', and 5'-ttcgacggcttcgctcggg-3'. The primer pair  
46 5'-gcggtgatcagcagcttg-3', and 5'-cacatcctgagtgagtc-3' was used to design a DNA probe to  
47 analyze the  $\Delta acs$  mutant. The PCR products were labelled with digoxigenin dUTP (Roche  
48 Applied Science) and were used to detect the size change in fragments of digested genomic  
49 DNA in the wild type and the mutant strains. *Pst* I-digestion of chromosomal DNA produced  
50 a 1,235 bp fragment in the wild type, and an 861 bp fragment in the  $\Delta ackA$  mutant. Double  
51 digestion of genomic DNA by *Hind* III and *Kpn* I produced a 1,294 bp fragment in the wild  
52 type and a 5,681 bp fragment in the  $\Delta ackA$  mutant. *Dra* III digested chromosomal DNA  
53 produced a 3,593 bp fragment in the wild type and a 1,973 bp fragment in the  $\Delta pta$  mutant.  
54 The *Hpa* I and *Cla* I digestion produced a 2,761 bp fragment in the wild type and a 3,331 bp  
55 fragment in the  $\Delta pta$  mutant. *Age* I digested chromosomal DNA produced a 2,524 bp  
56 fragment in the wild type and a 1,627 bp fragment in the  $\Delta acs$  mutant. For detection, the  
57 fragments were separated by agarose gel electrophoresis, transferred to a nylonmembrane, and

58 hybridized with the respective probe. Southern blotting and DNA hybridization were  
59 performed according to the manufacturer's instructions (Roche Applied Science).

60

61 **Supplementary Figure S2**

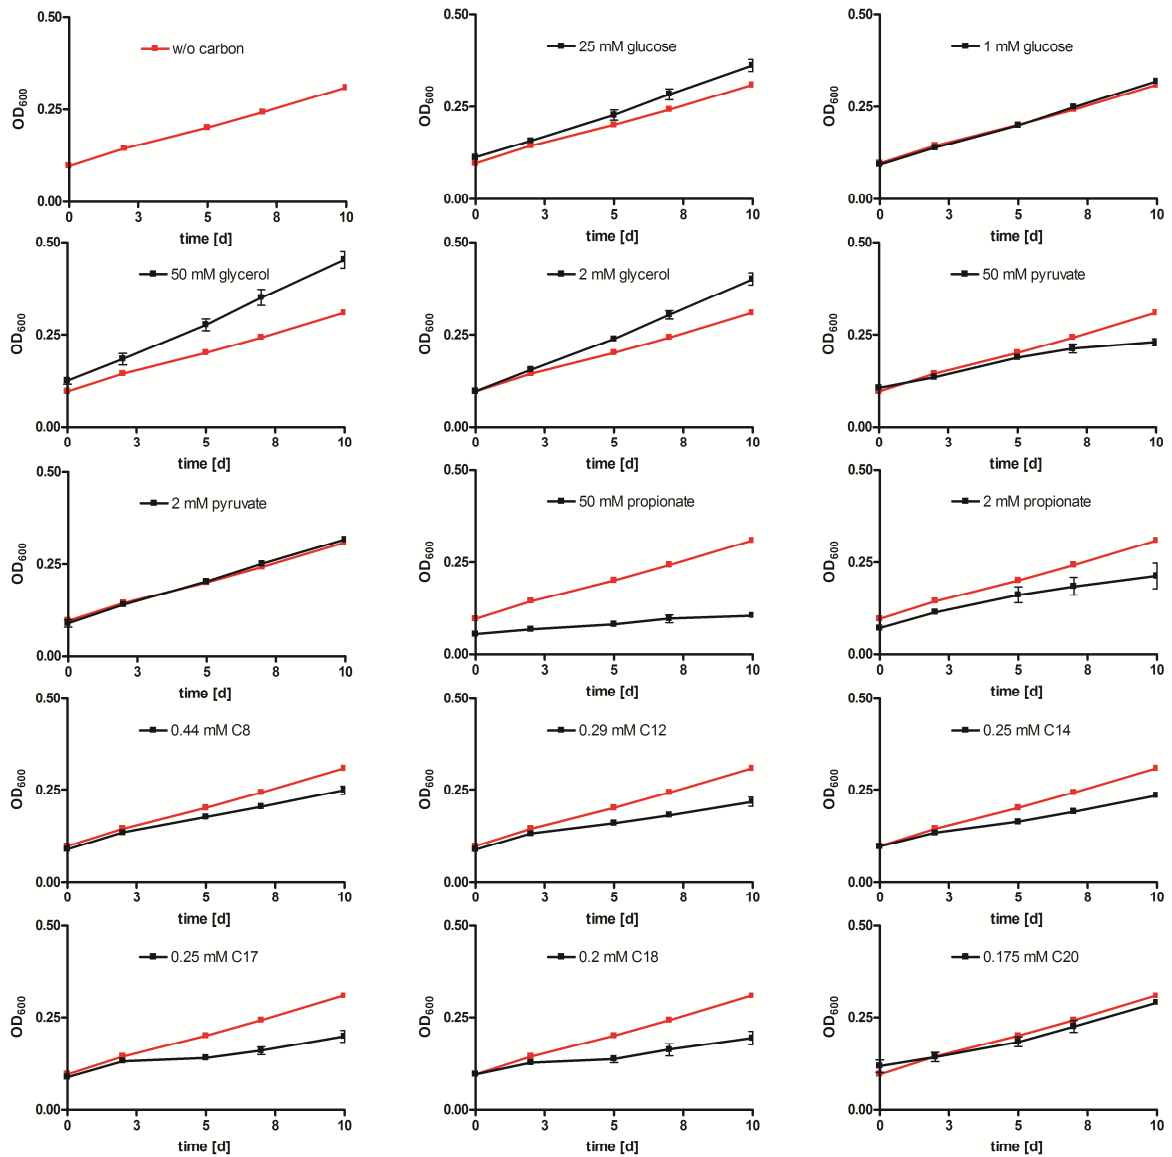

62

63 **Figure S2: Growth of *Mtb* wild type strain on different carbon substrates. *Mtb* H37Rv**

64 was grown for 10 days in standing culture tubes in a standard growth medium containing 7H9

65 broth supplemented with 0.5% AS and 0.05% tween 80 (red squares). To analyze the impact

66 of the carbon source on growth, different substrates were added to the standard medium

67 (black squares) and growth was followed by measuring OD<sub>600</sub>. Growth on standard medium

68 with and without additional carbon source was compared for each substrate. Data represents

69 the mean of three independent experiments, error bars indicate the SD.

70

71 **Supplementary Figure S3**

A

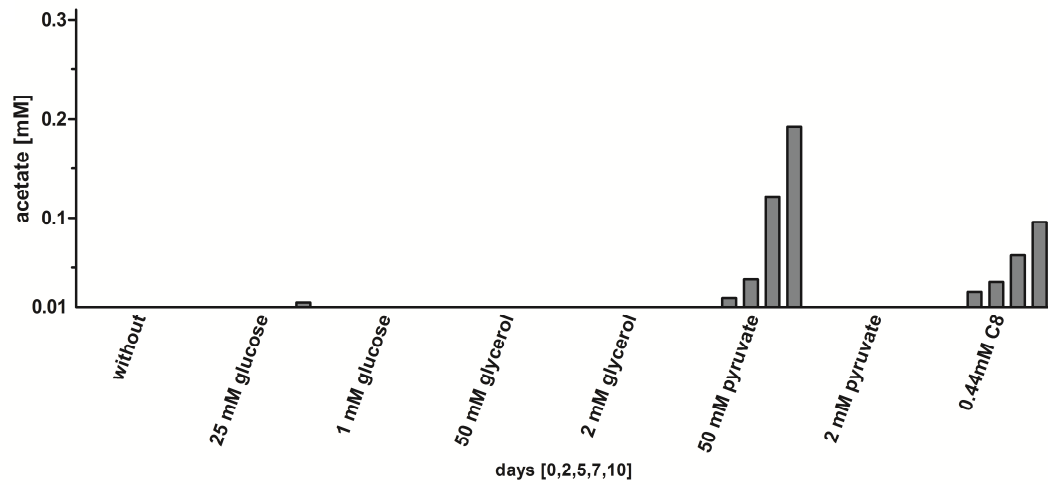

72

B

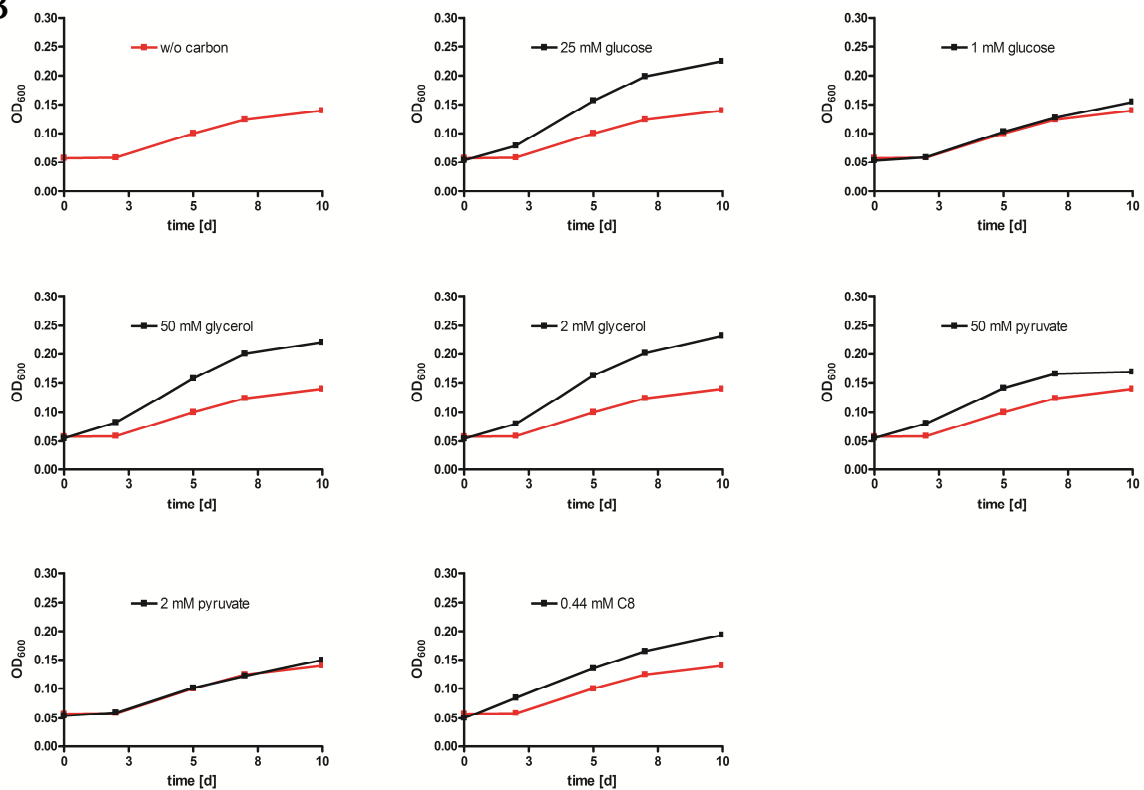

73

74 **Figure S3: Impact of a defined basic medium on growth and acetate secretion in the *Mtb***  
 75 **wild type strain.** *Mtb* H37Rv was grown for 10 days in standing cultures. The 7H9 based  
 76 medium contained 0.5% AS of a fatty acid free albumin and 0.05% tyloxapol. The medium  
 77 was supplemented with different carbon substrates and acetate secretion (A) and growth (B)  
 78 were detected at indicated time points. To analyze the effect of carbon supplementation,  
 79 growth of *Mtb* on the basic medium (red squares) was compared to growth in the presence of

80 the respective carbon source (black squares). Data shows one representative of two  
81 independent experiments.
